# Supplementary material for: VTA-projecting cerebellar neurons mediate stress-dependent depression-like behaviors
Source: eLife. 2022 Feb 14;11:e72981. doi: 10.7554/eLife.72981 (PMC8843095; doi:10.7554/eLife.72981)
Supplement: Figure 1—source data 1. [file elife-72981-fig1-data1.xlsx]

## Sheet: Statistics
Figure	Group compared							DF	t value	F value	95% LCL	95% UCL	P-value	Significance	Test
Figure 1B	CTR				RS			42	-4.11977				0.000174177	***	Student’s t-test
Figure 1C	CTR				RS			42	-3.55976				0.000937855	***	Student’s t-test
Figure 1D	CTR				RS			42	0.65569				0.5156		Student’s t-test
Figure 1F	CTR				RS			46	-3.39617				0.00142	***	Student’s t-test
Figure 1G	FN-CTR				FN-RS			14	-0.33728				0.74091		Student’s t-test
	IPN-CTR				IPN-RS			14	-2.31855				0.03606	*	Student’s t-test
	DN-CTR				DN-RS			14	-4.20602				0.000880188	***	Student’s t-test
Figure 1H	D3-CTR				D3-RS			8	-5.63776				0.000488308	***	Student’s t-test
	D7-CTR				D7-RS			8	-5.54495				0.000544186	***	Student’s t-test
	D10-CTR				D10-RS			8	-10.0923				7.92522e-06	***	Student’s t-test
Figure 1—figure supplement 1B	CTR				RS			42	1.75859				0.086		Student’s t-test
Figure 1—figure supplement 1E	3 Day	7 Day			10 Day		14 Day	3, 19		6.5124			0.00325		One-way ANOVA
	7 Day				3 Day			8	0.45455		-10.0647	15.649	0.65459		Fisher’s test
	10 Day				3 Day			8	2.78483		4.24955	29.9632	0.01181	*	Fisher’s test
	10 Day				7 Day			8	2.33028		1.4574	27.1711	0.03097	*	Fisher’s test
	14 Day				3 Day			11	3.69925		8.89364	32.0716	0.00152	**	Fisher’s test
	14 Day				7 Day			11	3.19498		6.10149	29.2795	0.00477	**	Fisher’s test
	14 Day				10 Day			11	0.60977		-8.21276	14.9652	0.54924		Fisher’s test
