# Supplementary material for: VTA-projecting cerebellar neurons mediate stress-dependent depression-like behaviors
Source: eLife. 2022 Feb 14;11:e72981. doi: 10.7554/eLife.72981 (PMC8843095; doi:10.7554/eLife.72981)
Supplement: Figure 1—source data 2. [file elife-72981-fig1-data2.xlsx]

## Sheet: Sheet1
Figure	Pair compared		Effect size	Test
Figure 1B	CTR	RS	1.22	TST
Figure 1C	CTR	RS	1.07	FST
Figure 1D	CTR	RS	0.198	OFT
