# Supplementary material for: VTA-projecting cerebellar neurons mediate stress-dependent depression-like behaviors
Source: eLife. 2022 Feb 14;11:e72981. doi: 10.7554/eLife.72981 (PMC8843095; doi:10.7554/eLife.72981)
Supplement: Figure 2—source data 1. [file elife-72981-fig2-data1.xlsx]

## Sheet: Statistics
Figure	Group compared							DF	t value	F value	95% LCL	95% UCL	P-value	Significance	Test
Figure 2B	Baseline (GFP+)		CNO (GFP+)			Washout (GFP+)		2		6.99335			0.0097	**	One-way ANOVA
	Baseline			CNO				8	3.70408		71.6499	276.35	0.00301	**	Fisher’s test
	Baseline			Washout				8	1.405		-36.3501	168.35	0.18538		Fisher’s test
	CNO			Washout				8	-2.29909		-210.35	-5.6499	0.05206		Fisher’s test
	Baseline (GFP-)		CNO (GFP-)			Washout (GFP-)		2		0.03054			0.96997		One-way ANOVA
	Baseline			CNO				14	0.1922		-122.751	147.751	0.84943		Fisher’s test
	Baseline			Washout				14	0.23064		-120.251	150.251	0.81983		Fisher’s test
	CNO			Washout				14	0.03844		-132.751	137.751	0.9697		Fisher’s test
Figure 2F	CTR		RS			Gq-CNO		2		13.1863			0.000256223	***	One-way ANOVA
	CTR				RS			14	4.49059		13.1186	36.023	0.000250476	***	Fisher’s test
	CTR				Gq-CNO			11	-0.43147		-15.8559	10.4359	0.67098		Fisher’s test
	RS				Gq-CNO			11	-4.2497		-40.7168	-13.8447	0.000433313	***	Fisher’s test
Figure 2G	CTR	RS			Sal		CNO	3, 83		8.28937			6.91169e-05	***	One-way ANOVA
	CTR				RS			42	4.24735		23.0814	63.7368	5.6168e-05	***	Fisher’s test
	CTR				Sal			41	3.90883		19.8538	60.9904	0.000188599	***	Fisher’s test
	CTR				CNO			42	4.00719		20.6268	61.2823	0.000133441	***	Fisher’s test
	RS				Sal			41	-0.28885		-23.5553	17.5813	0.77342		Fisher’s test
	RS				CNO			42	-0.24016		-22.7823	17.8732	0.8108		Fisher’s test
	Sal				CNO			41	0.05149		-20.0358	21.1008	0.95906		Fisher’s test
Figure 2H	CTR	RS			Sal		CNO	3, 83		7.04335			0.00028198	***	One-way ANOVA
	CTR				RS			42	3.80227		21.3956	68.3317	0.000272782	***	Fisher’s test
	CTR				Sal			41	3.87818		22.5551	70.0467	0.000209848	***	Fisher’s test
	CTR				CNO			42	3.5172		18.0319	64.9681	0.000710041	***	Fisher’s test
	RS				Sal			41	0.12038		-22.3086	25.1831	0.90447		Fisher’s test
	RS				CNO			42	-0.28507		-26.8317	20.1044	0.7763		Fisher’s test
	Sal				CNO			41	-0.40212		-28.5467	18.9449	0.68863		Fisher’s test
Figure 2I	CTR	RS			Sal		CNO	3, 83		0.17955			0.90999		One-way ANOVA
	CTR				RS			42	-0.57502		-785.377	433.104	0.56683		Fisher’s test
	CTR				Sal			41	-0.67796		-826.574	406.327	0.49968		Fisher’s test
	CTR				CNO			42	-0.45957		-750.013	468.468	0.64702		Fisher’s test
	RS				Sal			41	-0.10966		-650.438	582.464	0.91295		Fisher’s test
	RS				CNO			42	0.11545		-573.877	644.604	0.90837		Fisher’s test
	Sal				CNO			41	0.22376		-547.1	685.801	0.8235		Fisher’s test
Figure 2J	CTR		RS		Gq-Sal		Gq-CNO	3, 115		6.65022			0.00035081	***	One-way ANOVA
	CTR				RS			61	3.94295		23.7015	71.5553	0.00013872	***	Fisher’s test
	CTR				Sal			64	3.45239		17.1918	63.4736	0.000778346	***	Fisher’s test
	CTR				CNO			64	1.66401		-3.70101	42.5807	0.09883		Fisher’s test
	RS				Sal			51	-0.56525		-32.862	18.2705	0.573		Fisher’s test
	RS				CNO			51	-2.18398		-53.7548	-2.62231	0.03099	*	Fisher’s test
	Sal				CNO			54	-1.66658		-45.725	3.93929	0.09832		Fisher’s test
Figure2K	CTR		RS		Gq-Sal		Gq-CNO	3, 115		4.72548			0.0038	**	One-way ANOVA
	CTR				RS			61	2.8234		11.5999	66.1391	0.0056	**	Fisher’s test
	CTR				Sal			64	2.55386		7.63004	60.3775	0.01196	*	Fisher’s test
	CTR				CNO			64	-0.11774		-27.9414	24.806	0.90648		Fisher’s test
	RS				Sal			51	-0.33077		-34.0037	24.2722	0.74142		Fisher’s test
	RS				CNO			51	-2.74893		-69.5751	-11.2992	0.00695	**	Fisher’s test
	Sal				CNO			54	-2.48964		-63.8727	-7.27014	0.01422	*	Fisher’s test
Figure 2L	CTR		RS		Gq-Sal		Gq-CNO	3, 115		0.32836			0.32836		One-way ANOVA
	CTR				RS			61	0.8516		-440.629	1105.24	0.3962		Fisher’s test
	CTR				Sal			64	0.71013		-479.543	1015.54	0.47906		Fisher’s test
	CTR				CNO			64	0.18141		-679.079	816.003	0.85637		Fisher’s test
	RS				Sal			51	-0.15423		-890.198	761.584	0.8777		Fisher’s test
	RS				CNO			51	-0.6328		-1089.73	562.048	0.52812		Fisher’s test
	Sal				CNO			54	-0.49271		-1001.71	602.641	0.62316		Fisher’s test
Figure 2—figure supplement 1A	CTR	RS			Gq-Sal		Gq-CNO	3, 62		2.85483			0.04427	*	One-way ANOVA
	CTR				RS			35	2.7238		13.3379	86.9057	0.00837	**	Fisher’s test
	CTR				Sal			37	1.99287		-0.1073	70.2073	0.05068		Fisher’s test
	CTR				CNO			36	1.17722		-14.7669	57.0764	0.24361		Fisher’s test
	RS				Sal			26	-0.74435		-55.5477	25.4041	0.45948		Fisher’s test
	RS				CNO			25	-1.40744		-70.1086	12.1745	0.16429		Fisher’s test
	Sal				CNO			27	-0.69976		-53.5891	25.7987	0.48669		Fisher’s test
Figure 2—figure supplement 1B	CTR	RS			Gq-Sal		Gq-CNO	3, 62		4.11032			0.01005	*	One-way ANOVA
	CTR				RS			35	2.33592		5.96225	76.7044	0.02274	*	Fisher’s test
	CTR				Sal			37	1.0998		-15.2069	52.4069	0.27567		Fisher’s test
	CTR				CNO			36	-1.42748		-59.2086	9.8753	0.15846		Fisher’s test
	RS				Sal			26	-1.16757		-61.6546	16.1879	0.24745		Fisher’s test
	RS				CNO			25	-3.33487		-105.561	-26.4387	0.00144	**	Fisher’s test
	Sal				CNO			27	-2.26593		-81.436	-5.09737	0.02696	*	Fisher’s test
Figure 2—figure supplement 1C	CTR	RS			Gq-Sal		Gq-CNO	3, 62		0.29375			0.82976		One-way ANOVA
	CTR				RS			35	0.09978		-959.589	1060.42	0.92084		Fisher’s test
	CTR				Sal			37	0.90053		-530.459	1400.23	0.37132		Fisher’s test
	CTR				CNO			36	0.19743		-888.914	1083.75	0.84414		Fisher’s test
	RS				Sal			26	0.69152		-726.912	1495.84	0.49182		Fisher’s test
	RS				CNO			25	0.08317		-1082.66	1176.66	0.93399		Fisher’s test
	Sal				CNO			27	-0.61894		-1427.37	752.441	0.53822		Fisher’s test
Figure 2—figure supplement 1D	CTR	RS			RS-Sal		RS-CNO	3, 49		4.95856			0.00439	***	One-way ANOVA
	CTR				RS			24	2.9116		11.6287	63.4427	0.0054	**	Fisher’s test
	CTR				Sal			25	3.15819		14.4978	65.2275	0.00272	**	Fisher’s test
	CTR				CNO			26	0.75546		-15.5335	34.2478	0.45359		Fisher’s test
	RS				Sal			23	0.17738		-24.036	28.6898	0.85994		Fisher’s test
	RS				CNO			24	-2.18578		-54.0856	-2.27154	0.03364	*	Fisher’s test
	Sal				CNO			25	-2.41685		-55.8703	-5.14067	0.01942	*	Fisher’s test
Figure 2—figure supplement 1E	CTR	RS			RS-Sal		RS-CNO	3, 49		2.24197			0.09511		One-way ANOVA
	CTR				RS			24	1.65934		-7.16868	75.0973	0.10343		Fisher’s test
	CTR				Sal			25	2.48458		9.51911	90.0633	0.01644	*	Fisher’s test
	CTR				CNO			26	0.96616		-20.5193	58.5193	0.33871		Fisher’s test
	RS				Sal			23	0.75986		-26.0298	57.6837	0.45098		Fisher’s test
	RS				CNO			24	-0.73109		-56.0973	26.1687	0.46821		Fisher’s test
	Sal				CNO			25	-1.53648		-71.0633	9.48089	0.13085		Fisher’s test
Figure 2—figure supplement 1F	CTR	RS			RS-Sal		RS-CNO	3, 49		0.55118			0.64976		One-way ANOVA
	CTR				RS			24	0.61513		-738.554	1390.15	0.54132		Fisher’s test
	CTR				Sal			25	-0.38876		-1243.67	840.482	0.69914		Fisher’s test
	CTR				CNO			26	-0.61622		-1336.17	709.024	0.5406		Fisher’s test
	RS				Sal			23	-0.97853		-1610.47	555.689	0.33262		Fisher’s test
	RS				CNO			24	-1.20718		-1703.72	424.982	0.23316		Fisher’s test
	Sal				CNO			25	-0.21594		-1154.05	930.097	0.82993		Fisher’s test
Figure 2—figure supplement 2B	CTR	RS			Gq-Sal		Gq-CNO	3, 115		38.3736			6.6613e-16	***	One-way ANOVA
	CTR				RS			61	-8.92729		-3.48562	-2.21615	6.32816e-14	***	Fisher’s test
	CTR				Sal			64	-7.64321		-3.24567	-1.90599	2.61265e-11	***	Fisher’s test
	CTR				CNO			64	-8.75551		-3.47261	-2.18766	1.42217e-13	***	Fisher’s test
	RS				Sal			51	0.78835		-0.41843	0.96854	0.43264		Fisher’s test
	RS				CNO			51	0.06183		-0.64634	0.68784	0.95084		Fisher’s test
	Sal				CNO			54	-0.72149		-0.95488	0.44627	0.47254		Fisher’s test
Figure 2—figure supplement 2A and Figure 7—figure supplement 2A	CTR	RS	Sal	CNO	RS-Sal	RS-CNO		5, 125		32.3671			0	***	One-way ANOVA
	CTR				RS			42	-8.5167		-2.10065	-1.30844	4.4e-14	***	Fisher’s test
	CTR				Sal			42	-0.95387		-0.58701	0.2052	0.34199		Fisher’s test
	CTR				CNO			42	-1.77147		-0.75065	0.04156	0.07892		Fisher’s test
	CTR				RS-Sal			41	-8.63086		-2.14863	-1.34704	2.36e-14	***	Fisher’s test
	CTR				RS-CNO			42	-7.22216		-1.84156	-1.04935	4.41e-11	***	Fisher’s test
	RS				Sal			42	7.56283		1.11753	1.90974	7.42e-12	***	Fisher’s test
	RS				CNO			42	6.74523		0.9539	1.7461	5.07e-10	***	Fisher’s test
	RS				RS-Sal			41	-0.21377		-0.44408	0.3575	0.83108		Fisher’s test
	RS				RS-CNO			42	1.29454		-0.13701	0.6552	0.19787		Fisher’s test
	Sal				CNO			42	-0.8176		-0.55974	0.23247	0.41514		Fisher’s test
	Sal				RS-Sal			41	-7.68814		-1.95772	-1.15613	3.82e-12	***	Fisher’s test
	Sal				RS-CNO			42	-6.26829		-1.65065	-0.85844	5.42e-09	***	Fisher’s test
	CNO				RS-Sal			41	-6.8801		-1.79408	-0.9925	2.56e-10	***	Fisher’s test
	CNO				RS-CNO			42	-5.45069		-1.48701	-0.6948	2.57e-07	***	Fisher’s test
	RS-Sal				RS-CNO			41	1.49316		-0.09841	0.70317	0.13791		Fisher’s test
