# Supplementary material for: VTA-projecting cerebellar neurons mediate stress-dependent depression-like behaviors
Source: eLife. 2022 Feb 14;11:e72981. doi: 10.7554/eLife.72981 (PMC8843095; doi:10.7554/eLife.72981)
Supplement: Figure 2—source data 2. [file elife-72981-fig2-data2.xlsx]

## Sheet: Sheet1
Figure	Pair compared		Effect size	Test
Figure 2J	CTR	RS	0.997	TST
	CTR	Gq-Sal	0.74	TST
	CTR	Gq-CNO	0.414	TST
	RS	Gq-Sal	0.166	TST
	RS	Gq-CNO	0.825	TST
	Gq-Sal	Gq-CNO	0.485	TST
Figure 2K	CTR	RS	0.832	FST
	CTR	Gq-Sal	0.62	FST
	CTR	Gq-CNO	0.03	FST
	RS	Gq-Sal	0.089	FST
	RS	Gq-CNO	0.764	FST
	Gq-Sal	Gq-CNO	0.591	FST
Figure 2L	CTR	RS	0.217	OFT
	CTR	Gq-Sal	0.185	OFT
	CTR	Gq-CNO	0.043	OFT
	RS	Gq-Sal	0.045	OFT
	RS	Gq-CNO	0.168	OFT
	Gq-Sal	Gq-CNO	0.134	OFT
Figure 2—figure supplement 1D, Figure 7—figure supplement 1E	CTR	RS	1.242	TST
	CTR	Sal	0.282	TST
	CTR	CNO	0.32	TST
	CTR	RS-Sal	1.069	TST
	CTR	RS-CNO	1.069	TST
	RS	Sal	0.83	TST
	RS	CNO	1.058	TST
	RS	RS-Sal	0.104	TST
	RS	RS-CNO	0.083	TST
	Sal	CNO	0.007	TST
	Sal	RS-Sal	0.699	TST
	Sal	RS-CNO	0.704	TST
	CNO	RS-Sal	0.859	TST
	CNO	RS-CNO	0.86	TST
	RS-Sal	RS-CNO	0.016	TST
Figure 2—figure supplement 1E, Figure 7—figure supplement 1F	CTR	RS	1.073	FST
	CTR	Sal	0.266	FST
	CTR	CNO	0.314	FST
	CTR	RS-Sal	1.115	FST
	CTR	RS-CNO	1.15	FST
	RS	Sal	0.729	FST
	RS	CNO	0.835	FST
	RS	RS-Sal	0.034	FST
	RS	RS-CNO	0.092	FST
	Sal	CNO	0.005	FST
	Sal	RS-Sal	0.765	FST
	Sal	RS-CNO	0.739	FST
	CNO	RS-Sal	0.879	FST
	CNO	RS-CNO	0.889	FST
	RS-Sal	RS-CNO	0.132	FST
Figure 2—figure supplement 1F, Figure 7—figure supplement 1G	CTR	RS	0.198	OFT
	CTR	Sal	0.031	OFT
	CTR	CNO	0.116	OFT
	CTR	RS-Sal	0.216	OFT
	CTR	RS-CNO	0.132	OFT
	RS	Sal	0.161	OFT
	RS	CNO	0.047	OFT
	RS	RS-Sal	0.035	OFT
	RS	RS-CNO	0.033	OFT
	Sal	CNO	0.088	OFT
	Sal	RS-Sal	0.182	OFT
	Sal	RS-CNO	0.103	OFT
	CNO	RS-Sal	0.074	OFT
	CNO	RS-CNO	0.012	OFT
	RS-Sal	RS-CNO	0.061	OFT
