# Supplementary material for: VTA-projecting cerebellar neurons mediate stress-dependent depression-like behaviors
Source: eLife. 2022 Feb 14;11:e72981. doi: 10.7554/eLife.72981 (PMC8843095; doi:10.7554/eLife.72981)
Supplement: Figure 2—source data 3. [file elife-72981-fig2-data3.xlsx]

## Sheet: Sheet1
Figure	Group	Male	Female	Total
Figure 2G-I	CTR	12	10	22
	RS	12	10	22
	RS-Sal	11	10	21
	RS-CNO	10	12	22
Figure 2J-L	CTR	19	19	38
	RS	14	11	25
	Gq-RS-Sal	15	13	28
	Gq-RS-CNO	16	12	28
Figure 2—figure supplement 1A-C	CTR	11	13	24
	RS	8	5	13
	Gq-RS-Sal	9	6	15
	Gq-RS-CNO	8	6	14
Figure 2—figure supplement 1D-F	CTR	8	6	14
	RS	6	6	12
	Gq-RS-Sal	6	7	13
	Gq-RS-CNO	8	6	14
