# Supplementary material for: VTA-projecting cerebellar neurons mediate stress-dependent depression-like behaviors
Source: eLife. 2022 Feb 14;11:e72981. doi: 10.7554/eLife.72981 (PMC8843095; doi:10.7554/eLife.72981)
Supplement: Figure 4—source data 1. [file elife-72981-fig4-data1.xlsx]

## Sheet: Statistics
Figure	Group compared							DF	t value	F value	95% LCL	95% UCL	P-value	Significance	Test
Figure 4F	Baseline		TTX		TTX+4AP			1		14.9954			0.01796		One-way ANOVA (RM)
	Baseline				TTX			8	3.69159		50.6704	219.33	0.00612	**	Fisher’s test
	Baseline				TTX+4AP			8	1.06646		-45.3296	123.33	0.31734		Fisher’s test
	TTX				TTX+4AP			8	2.62513		-180.33	-11.6704	0.03041	*	Fisher’s test
Figure 4G	DA (pA)				GABA (pA)			10	1.34555				0.20816		Student’s t-test
	DA (ms)				GABA (ms)			10	0.45032				0.66209		Student’s t-test
Figure 4—figure supplement 1C	Zs-negative				Zs-positive			12	5.41753				0.000155608	***	Student’s t-test
