# Supplementary material for: VTA-projecting cerebellar neurons mediate stress-dependent depression-like behaviors
Source: eLife. 2022 Feb 14;11:e72981. doi: 10.7554/eLife.72981 (PMC8843095; doi:10.7554/eLife.72981)
Supplement: Figure 5—source data 1. [file elife-72981-fig5-data1.xlsx]

## Sheet: Statistics
Figure	Group compared							DF	t value	F value	95% LCL	95% UCL	P-value	Significance	Test
Figure 5G	Control				Bicuculline			8	5.06827				0.000967079	***	Student’s t-test
