# Supplementary material for: VTA-projecting cerebellar neurons mediate stress-dependent depression-like behaviors
Source: eLife. 2022 Feb 14;11:e72981. doi: 10.7554/eLife.72981 (PMC8843095; doi:10.7554/eLife.72981)
Supplement: Figure 6—source data 1. [file elife-72981-fig6-data1.xlsx]

## Sheet: Statistics
Figure	Group compared							DF	t value	F value	95% LCL	95% UCL	P-value	Significance	Test
Figure 6B	CTR	RS			Gi-Sal		Gi-CNO	3, 112		3.32417			0.02234	*	One-way ANOVA
	CTR				RS			74	2.20029		1.6736	31.9679	0.02984	*	Fisher’s test
	CTR				Sal			52	2.52819		5.10633	42.1113	0.01286	*	Fisher’s test
	CTR				CNO			52	0.02772		-18.2437	18.7613	0.97794		Fisher’s test
	RS				Sal			60	0.754		-11.0498	24.626	0.45243		Fisher’s test
	RS				CNO			60	-1.83964		-34.3998	1.276	0.06847		Fisher’s test
	Sal				CNO			38	-2.22826		-44.1129	-2.58711	0.02786	*	Fisher’s test
Figure 6C	CTR	RS			Gi-Sal		Gi-CNO	3, 112		11.088			1.98164e-06	***	One-way ANOVA
	CTR				RS			74	4.71995		23.198	56.7656	6.86984e-06	***	Fisher’s test
	CTR				Sal			52	4.53062		26.3777	67.3811	1.47852e-05	***	Fisher’s test
	CTR				CNO			52	0.94029		-10.7723	30.2311	0.34909		Fisher’s test
	RS				Sal			60	0.69145		-12.8677	26.6629	0.49071		Fisher’s test
	RS				CNO			60	-3.03264		-50.0177	-10.487	0.00301	**	Fisher’s test
	Sal				CNO			38	-3.19946		-60.1564	-14.1436	0.00179	**	Fisher’s test
Figure 6D	CTR	RS			Gi-Sal		Gi-CNO	3, 112		0.7148			0.54515	0.63818	One-way ANOVA
	CTR				RS			74	0.48701		-500.537	826.786	0.6272		Fisher’s test
	CTR				Sal			52	-0.99285		-1216.89	404.453	0.32293		Fisher’s test
	CTR				CNO			52	409.148		-738.994	882.353	0.86125		Fisher’s test
	RS				Sal			60	-1.44338		-1350.9	212.21	0.1517		Fisher’s test
	RS				CNO			60	394.452		-873.001	690.11	0.81709		Fisher’s test
	Sal				CNO			38	459.132		-431.812	1387.61	0.30017		Fisher’s test
Figure 6E	CTR	RS			Gi-Sal		Gi-CNO	3, 81		14.7896			9.13765e-08	***	One-way ANOVA
	CTR				RS			42	-5.11704		-33.8381	-14.8907	2.04567e-06	***	Fisher’s test
	CTR				Sal			41	-5.91385		-38.1206	-18.9272	7.62746e-08	***	Fisher’s test
	CTR				CNO			42	-2.25675		-20.2191	-1.27161	0.02672	*	Fisher’s test
	RS				Sal			39	-0.8439		-13.9665	5.64746	0.40121		Fisher’s test
	RS				CNO			40	2.79742		3.9324	23.3057	0.00643	**	Fisher’s test
	Sal				CNO			39	3.607		7.97158	27.5856	0.000534248	***	Fisher’s test
Figure 6F	CTR	RS			Gi-Sal		Gi-CNO	3, 59		4.66496			0.00543	**	One-way ANOVA
	CTR				RS			28	3.38759		63.8532	248.147	0.00126	**	Fisher’s test
	CTR				Sal			29	2.81585		36.9336	218.325	0.0066	**	Fisher’s test
	CTR				CNO			30	1.37084		-28.1524	150.639	0.17562		Fisher’s test
	RS				Sal			29	-0.62594		-119.066	62.3248	0.53377		Fisher’s test
	RS				CNO			30	-2.121		-184.152	-5.36133	0.03813	*	Fisher’s test
	Sal				CNO			31	-1.51126		-154.285	21.5129	0.13606		Fisher’s test
Figure 6G	CTR	RS			Gi-Sal		Gi-CNO	3, 59		0.56803			0.63818		One-way ANOVA
	CTR				RS			28	1.14161		-11.6244	42.5577	0.25808		Fisher’s test
	CTR				Sal			29	0.49768		-19.4822	32.3933	0.6205		Fisher’s test
	CTR				CNO			30	1.04785		-12.5096	40.0547	0.29884		Fisher’s test
	RS				Sal			29	-0.6947		-34.9488	16.9266	0.48988		Fisher’s test
	RS				CNO			30	-0.12889		-27.9763	24.5881	0.89787		Fisher’s test
	Sal				CNO			31	0.58311		-17.7747	32.4087	0.56197		Fisher’s test
Figure 6—figure supplement 1A	CTR	RS			Gi-Sal		Gi-CNO	3, 112		50.3188			0	***	One-way ANOVA
	CTR				RS			74	-11.003		-2.206	-1.53325	5.55316e-20	***	Fisher’s test
	CTR				Sal			52	-7.72033		-1.67847	-0.99337	3.58317e-12	***	Fisher’s test
	CTR				CNO			52	-9.71217		-2.00437	-1.32563	7.24402e-17	***	Fisher’s test
	RS				Sal			60	2.97897		0.17905	0.88836	0.00349		Fisher’s test
	RS				CNO			60	1.15211		-0.14697	0.55622	0.25153		Fisher’s test
	Sal				CNO			38	-1.82221		-0.68659	0.02842	0.07087		Fisher’s test
Figure 6—figure supplement 1B	CTR	RS			Gi-Sal		Gi-CNO	3, 81		14.5721			1.12379e-07	***	One-way ANOVA
	CTR				RS			42	-5.86235		-2.30804	-1.13834	9.48545e-08	***	Fisher’s test
	CTR				Sal			41	-4.9588		-2.06897	-0.88408	3.83655e-06	***	Fisher’s test
	CTR				CNO			42	-4.97134		-2.04613	-0.87643	3.65121e-06	***	Fisher’s test
	RS				Sal			39	0.81065		-0.35876	0.85209	0.41994		Fisher’s test
	RS				CNO			40	0.87143		-0.33609	0.8599	0.3861		Fisher’s test
	Sal				CNO			39	0.05008		-0.59019	0.62066	0.96018		Fisher’s test
