# Supplementary material for: VTA-projecting cerebellar neurons mediate stress-dependent depression-like behaviors
Source: eLife. 2022 Feb 14;11:e72981. doi: 10.7554/eLife.72981 (PMC8843095; doi:10.7554/eLife.72981)
Supplement: Figure 6—source data 2. [file elife-72981-fig6-data2.xlsx]

## Sheet: Sheet1
Figure	Pair compared		Effect size	Test
Figure 6B	CTR	RS	0.5	TST
	CTR	Gi-Sal	0.745	TST
	CTR	Gi-CNO	0.007	TST
	RS	Gi-Sal	0.25	TST
	RS	Gi-CNO	0.475	TST
	Gi-Sal	Gi-CNO	0.708	TST
Figure 6C	CTR	RS	1.14	FST
	CTR	Gi-Sal	1.212	FST
	CTR	Gi-CNO	0.251	FST
	RS	Gi-Sal	0.189	FST
	RS	Gi-CNO	0.824	FST
	Gi-Sal	Gi-CNO	0.925	FST
Figure 6D	CTR	RS	0.114	OFT
	CTR	Gi-Sal	0.279	OFT
	CTR	Gi-CNO	0.051	OFT
	RS	Gi-Sal	0.376	OFT
	RS	Gi-CNO	0.063	OFT
	Gi-Sal	Gi-CNO	0.324	OFT
