# Supplementary material for: VTA-projecting cerebellar neurons mediate stress-dependent depression-like behaviors
Source: eLife. 2022 Feb 14;11:e72981. doi: 10.7554/eLife.72981 (PMC8843095; doi:10.7554/eLife.72981)
Supplement: Figure 6—source data 3. [file elife-72981-fig6-data3.xlsx]

## Sheet: Sheet1
Figure	Group	Male	Female	Total
Figure 6B-D	CTR	17	17	34
	RS	21	21	42
	Gi-RS-Sal	10	10	20
	Gi-RS-CNO	11	9	20
Figure 6E	CTR	12	11	23
	RS	10	11	21
	Gi-RS-Sal	10	10	20
	Gi-RS-CNO	11	10	21
Figure 6F-G	CTR	7	8	15
	RS	7	8	15
	Gi-RS-Sal	8	8	16
	Gi-RS-CNO	9	8	17
