# Supplementary material for: VTA-projecting cerebellar neurons mediate stress-dependent depression-like behaviors
Source: eLife. 2022 Feb 14;11:e72981. doi: 10.7554/eLife.72981 (PMC8843095; doi:10.7554/eLife.72981)
Supplement: Figure 7—source data 1. [file elife-72981-fig7-data1.xlsx]

## Sheet: Statistics
Figure	Group compared							DF	t value	F value	95% LCL	95% UCL	P-value	Significance	Test
Figure 7B	CTR	RS			Gq-Sal		Gq-CNO	3, 66		7.37436			0.000246272	***	One-way ANOVA
	CTR				RS			29	4.22691		23.5135	65.6115	7.44222e-05	***	Fisher’s test
	CTR				Sal			33	1.34146		-6.52052	33.2245	0.18437		Fisher’s test
	CTR				CNO			34	3.31464		12.9684	52.2566	0.00149	**	Fisher’s test
	RS				Sal			32	-3.08044		-51.4394	-10.9816	0.00301	**	Fisher’s test
	RS				CNO			33	-1.19268		-31.9545	8.05454	0.23727		Fisher’s test
	Sal				CNO			37	2.04954		0.49781	38.0232	0.04439	*	Fisher’s test
Figure 7C	CTR	RS			Gq-Sal		Gq-CNO	3, 66		16.172			5.50699e-08	***	One-way ANOVA
	CTR				RS			29	5.53996		46.129	98.1127	5.67651e-07	***	Fisher’s test
	CTR				Sal			33	4.13476		26.2799	75.3582	0.000102491	***	Fisher’s test
	CTR				CNO			34	6.48077		54.4804	102.995	1.34276e-08	***	Fisher’s test
	RS				Sal			32	-1.70263		-46.281	3.67748	0.09334		Fisher’s test
	RS				CNO			33	0.53479		-18.0855	31.3189	0.59459		Fisher’s test
	Sal				CNO			37	2.40587		4.74967	51.0872	0.01894	*	Fisher’s test
Figure 7D	CTR	RS			Gq-Sal		Gq-CNO	3, 66		2.12508			0.10539		One-way ANOVA
	CTR				RS			29	1.75622		-126.017	1967.67	0.08369		Fisher’s test
	CTR				Sal			33	-0.0335		-1004.92	971.747	0.97337		Fisher’s test
	CTR				CNO			34	-0.59383		-1267.55	686.397	0.55466		Fisher’s test
	RS				Sal			32	-1.86033		-1943.47	68.647	0.06729		Fisher’s test
	RS				CNO			33	-2.43104		-2206.3	-216.501	0.01778	*	Fisher’s test
	Sal				CNO			37	-0.58623		-1207.13	659.149	0.55972		Fisher’s test
Figure 7F	CTR	RS			Gq-Sal		Gq-CNO	3, 109		13.1998			2.04954e-07	***	One-way ANOVA
	CTR				RS			52	-4.89707		-40.685	-17.2409	3.39684e-06	***	Fisher’s test
	CTR				Sal			54	-0.73093		-15.7659	7.2704	0.46639		Fisher’s test
	CTR				CNO			55	-4.60731		-37.9845	-15.134	1.1128e-05	***	Fisher’s test
	RS				Sal			54	4.25282		13.197	36.2334	4.47591e-05	***	Fisher’s test
	RS				CNO			55	0.41698		-9.02153	13.8289	0.67752		Fisher’s test
	Sal				CNO			57	-3.94265		-33.5275	-11.0955	0.000142742	***	Fisher’s test
Figure 7G	CTR	RS			Gq-Sal		Gq-CNO	3, 96		5.65795			0.0013	**	One-way ANOVA
	CTR				RS			48	3.03002		45.1866	216.845	0.00314	**	Fisher’s test
	CTR				Sal			51	-0.37123		-98.8942	67.7318	0.71128		Fisher’s test
	CTR				CNO			47	2.28608		13.1656	186.754	0.02445	*	Fisher’s test
	RS				Sal			49	-3.42091		-231.66	-61.5342	0.00091819	***	Fisher’s test
	RS				CNO			45	-0.69676		-119.532	57.4193	0.48764		Fisher’s test
	Sal				CNO			48	2.6657		29.5046	201.578	0.00902	**	Fisher’s test
Figure 7H	CTR	RS			Gq-Sal		Gq-CNO	3, 85		9.436			1.89581e-05	***	One-way ANOVA
	CTR				RS			40	4.48551		23.8866	61.9229	2.26292e-05	***	Fisher’s test
	CTR				Sal			42	1.12782		-8.04942	29.1509	0.26257		Fisher’s test
	CTR				CNO			43	3.91407		17.8357	54.6643	0.000182408	***	Fisher’s test
	RS				Sal			42	-3.45849		-50.9542	-13.7539	0.000851197	***	Fisher’s test
	RS				CNO			43	-0.71854		-25.069	11.7595	0.47439		Fisher’s test
	Sal				CNO			45	2.84153		7.71707	43.6815	0.00562	**	Fisher’s test
Figure 7I	CTR	RS			Gq-Sal		Gq-CNO	3, 85		7.45984			0.000171366	***	One-way ANOVA
	CTR				RS			40	3.06088		10.8465	51.0582	0.00295	**	Fisher’s test
	CTR				Sal			42	0.6588		-13.1484	26.1794	0.5118		Fisher’s test
	CTR				CNO			43	4.0142		19.8362	58.771	0.000128048	***	Fisher’s test
	RS				Sal			42	-2.47087		-44.1008	-4.77294	0.01548	*	Fisher’s test
	RS				CNO			43	0.85293		-11.1162	27.8186	0.39609		Fisher’s test
	Sal				CNO			45	3.42921		13.7774	51.7987	0.000935964	***	Fisher’s test
Figure 7J	CTR	RS			Gq-Sal		Gq-CNO	3, 85		0.43351			0.72956		One-way ANOVA
	CTR				RS			40	-0.62654		-1286.41	669.934	0.53264		Fisher’s test
	CTR				Sal			42	0.32714		-799.264	1114.08	0.74436		Fisher’s test
	CTR				CNO			43	-0.55854		-1213.17	681.052	0.57795		Fisher’s test
	RS				Sal			42	0.08855		-491.026	1422.32	0.33591		Fisher’s test
	RS				CNO			43	0.08855		-904.933	989.29	0.92965		Fisher’s test
	Sal				CNO			45	-0.91034		-1348.36	501.421	0.36522		Fisher’s test
Figure 7—figure supplement 1B	CTR	RS			Sal		CNO	3, 84		5.29317			0.00216	**	One-way ANOVA
	CTR				RS			42	3.81379		20.7745	66.0437	0.000260363	***	Fisher’s test
	CTR				Sal			42	1.10221		-10.0892	35.1801	0.27352		Fisher’s test
	CTR				CNO			42	1.07825		-10.3619	34.9073	0.28401		Fisher’s test
	RS				Sal			42	-2.71159		-53.4982	-8.22902	0.00812	**	Fisher’s test
	RS				CNO			42	-2.73555		-53.771	-8.50175	0.0076	**	Fisher’s test
	Sal				CNO			42	-0.02396		-22.9073	22.3619	0.98094		Fisher’s test
Figure 7—figure supplement 1C	CTR	RS			Sal		CNO	3, 84		4.61856			0.00486	**	One-way ANOVA
	CTR				RS			42	3.53676		19.6382	70.0891	0.000662316	***	Fisher’s test
	CTR				Sal			42	0.93883		-13.3164	37.1345	0.35051		Fisher’s test
	CTR				CNO			42	0.95675		-13.0891	37.3618	0.34144		Fisher’s test
	RS				Sal			42	-2.59792		-58.18	-7.7291	0.01107	*	Fisher’s test
	RS				CNO			42	-2.58		-57.9527	-7.50182	0.01162	*	Fisher’s test
	Sal				CNO			42	0.01792		-24.9982	25.4527	0.98575		Fisher’s test
Figure 7—figure supplement 1D	CTR	Gi-CNO			Sal		CNO	3, 84		4.61856			0.00486		One-way ANOVA
	CTR				RS			42	3.53676		19.6382	70.0891	0.000662316		Fisher’s test
	CTR				Sal			42	0.93883		-13.3164	37.1345	0.35051		Fisher’s test
	CTR				CNO			42	0.95675		-13.0891	37.3618	0.34144		Fisher’s test
	RS				Sal			42	-2.59792		-58.18	-7.7291	0.01107		Fisher’s test
	RS				CNO			42	-2.58		-57.9527	-7.50182	0.01162		Fisher’s test
	Sal				CNO			42	0.01792		-24.9982	25.4527	0.98575		Fisher’s test
Figure 7—figure supplement 1E	CTR	RS			Sal		CNO	3, 83		3.03443			0.03309	*	One-way ANOVA
	CTR				RS			54	2.83003		7.3365	41.8506	0.0057	**	Fisher’s test
	CTR				Sal			44	1.84021		-1.6135	42.4006	0.06893		Fisher’s test
	CTR				CNO			45	1.99433		0.09245	43.1696	0.04904	*	Fisher’s test
	RS				Sal			38	-0.38625		-25.7931	17.3931	0.70019		Fisher’s test
	RS				CNO			39	-0.27861		-24.078	18.153	0.78116		Fisher’s test
	Sal				CNO			29	0.09772		-23.9094	26.3844	0.92236		Fisher’s test
Figure 7—figure supplement 1F	CTR	RS			Sal		CNO	3, 83		5.5544			0.0015		One-way ANOVA
	CTR				RS			54	4.02047		21.4894	63.4359	0.000117977	***	Fisher’s test
	CTR				Sal			44	2.20376		2.93556	56.4279	0.03001	*	Fisher’s test
	CTR				CNO			45	2.16097		2.30906	54.6627	0.03327	*	Fisher’s test
	RS				Sal			38	-0.96713		-39.024	13.4621	0.33599		Fisher’s test
	RS				CNO			39	-1.08154		-39.6394	11.6858	0.28225		Fisher’s test
	Sal				CNO			29	-0.0777		-31.758	29.3663	0.93823		Fisher’s test
Figure 7—figure supplement 1G	CTR	RS			Sal		CNO	3, 83		1.27909			0.28619		One-way ANOVA
	CTR				RS			54	1.95768		-13.8401	1940.57	0.05327		Fisher’s test
	CTR				Sal			44	0.76797		-764.244	1728.12	0.44445		Fisher’s test
	CTR				CNO			45	0.86466		-688.592	1750.71	0.38945		Fisher’s test
	RS				Sal			38	-0.78187		-1704.17	741.31	0.43628		Fisher’s test
	RS				CNO			39	-0.71797		-1628	763.388	0.47458		Fisher’s test
	Sal				CNO			29	0.06851		-1374.85	1473.1	0.94553		Fisher’s test
Figure 7—figure supplement 1H	CTR	RS			Gq-Sal		Gq-CNO	3, 96		0.09388			0.96325		One-way ANOVA
	CTR				RS			48	0.45164		-10.002	15.893	0.65256		Fisher’s test
	CTR				Sal			51	0.02138		-12.4326	12.7033	0.98299		Fisher’s test
	CTR				CNO			47	0.01624		-13.1416	13.3584	0.98708		Fisher’s test
	RS				Sal			49	-0.43477		-15.6421	10.0217	0.66472		Fisher’s test
	RS				CNO			45	-0.41719		-16.3378	10.6636	0.67748		Fisher’s test
	Sal				CNO			48	-0.00407		-13.164	13.1101	0.99676		Fisher’s test
Figure 2—figure supplement 2A and Figure 7—figure supplement 2A	CTR	RS	Sal	CNO	RS-Sal	RS-CNO		5, 125		32.3671			0	***	One-way ANOVA
	CTR				RS			42	-8.5167		-2.10065	-1.30844	4.4e-14	***	Fisher’s test
	CTR				Sal			42	-0.95387		-0.58701	0.2052	0.34199		Fisher’s test
	CTR				CNO			42	-1.77147		-0.75065	0.04156	0.07892		Fisher’s test
	CTR				RS-Sal			41	-8.63086		-2.14863	-1.34704	2.36e-14	***	Fisher’s test
	CTR				RS-CNO			42	-7.22216		-1.84156	-1.04935	4.41e-11	***	Fisher’s test
	RS				Sal			42	7.56283		1.11753	1.90974	7.42e-12	***	Fisher’s test
	RS				CNO			42	6.74523		0.9539	1.7461	5.07e-10	***	Fisher’s test
	RS				RS-Sal			41	-0.21377		-0.44408	0.3575	0.83108		Fisher’s test
	RS				RS-CNO			42	1.29454		-0.13701	0.6552	0.19787		Fisher’s test
	Sal				CNO			42	-0.8176		-0.55974	0.23247	0.41514		Fisher’s test
	Sal				RS-Sal			41	-7.68814		-1.95772	-1.15613	3.82e-12	***	Fisher’s test
	Sal				RS-CNO			42	-6.26829		-1.65065	-0.85844	5.42e-09	***	Fisher’s test
	CNO				RS-Sal			41	-6.8801		-1.79408	-0.9925	2.56e-10	***	Fisher’s test
	CNO				RS-CNO			42	-5.45069		-1.48701	-0.6948	2.57e-07	***	Fisher’s test
	RS-Sal				RS-CNO			41	1.49316		-0.09841	0.70317	0.13791		Fisher’s test
Figure 7—figure supplement 2B	CTR	RS			Gq-Sal		Gq-CNO	3, 83		36.6008			1.1102e-16	***	One-way ANOVA
	CTR				RS			54	-9.12744		-2.26694	-1.45892	1.7146e-12	***	Fisher’s test
	CTR				Sal			44	-7.94062		-2.15243	-1.29344	1.0739e-12	***	Fisher’s test
	CTR				CNO			45	-7.53005		-2.10854	-1.23074	9.4094e-12	***	Fisher’s test
	RS				Sal			38	0.63381		-0.29723	0.57723	0.52738		Fisher’s test
	RS				CNO			39	0.85697		-0.25318	0.63977	0.39313		Fisher’s test
	Sal				CNO			29	0.22462		-0.41637	0.52296	0.82264		Fisher’s test
Figure 7—figure supplement 2C	CTR	RS			Gq-Sal		Gq-CNO	3, 66		10.7878			1.55772e-05	***	One-way ANOVA
	CTR				RS			29	-4.32137		-1.82793	-0.66707	7.76479e-05	***	Fisher’s test
	CTR				Sal			33	-0.64931		-0.67701	0.34648	0.51923		Fisher’s test
	CTR				CNO			34	-0.67143		-0.67907	0.33907	0.50516		Fisher’s test
	RS				Sal			32	5.0709		0.65313	1.51135	6.3294e-06	***	Fisher’s test
	RS				CNO			33	5.08652		0.65158	1.50342	6.00017e-06	***	Fisher’s test
	Sal				CNO			37	-0.0292		-0.33091	0.32144	0.97683		Fisher’s test
Figure 7—figure supplement 2D	CTR	RS			Gq-Sal		Gq-CNO	3, 109		66.7347			0	***	One-way ANOVA
	CTR				RS			52	-12.8301		-2.33033	-1.7067	1.60664e-23	***	Fisher’s test
	CTR				Sal			54	-2.55444		-0.70128	-0.0885	0.01202	*	Fisher’s test
	CTR				CNO			55	-2.14721		-0.63318	-0.02534	0.03399	*	Fisher’s test
	RS				Sal			54	10.5028		1.31723	1.93002	3.01942e-18	***	Fisher’s test
	RS				CNO			55	11.0162		1.38534	1.99318	2.02692e-19	***	Fisher’s test
	Sal				CNO			57	0.43599		-0.23272	0.36399	0.6637		Fisher’s test
