# Supplementary material for: VTA-projecting cerebellar neurons mediate stress-dependent depression-like behaviors
Source: eLife. 2022 Feb 14;11:e72981. doi: 10.7554/eLife.72981 (PMC8843095; doi:10.7554/eLife.72981)
Supplement: Figure 7—source data 2. [file elife-72981-fig7-data2.xlsx]

## Sheet: Sheet1
Figure	Pair compared		Effect size	Test
Figure 7B	CTR	RS	1.928	TST
	CTR	Gq-Sal	0.427	TST
	CTR	Gq-CNO	1.104	TST
	RS	Gq-Sal	1.121	TST
	RS	Gq-CNO	0.462	TST
	Gq-Sal	Gq-CNO	0.577	TST
Figure 7C	CTR	RS	2.348	FST
	CTR	Gq-Sal	1.232	FST
	CTR	Gq-CNO	2.219	FST
	RS	Gq-Sal	0.594	FST
	RS	Gq-CNO	0.228	FST
	Gq-Sal	Gq-CNO	0.698	FST
Figure 7D	CTR	RS	0.584	OFT
	CTR	Gq-Sal	0.013	OFT
	CTR	Gq-CNO	0.215	OFT
	RS	Gq-Sal	0.591	OFT
	RS	Gq-CNO	0.739	OFT
	Gq-Sal	Gq-CNO	0.2	OFT
Figure 7F	CTR	RS	1.2	SST
	CTR	Gq-Sal	0.162	SST
	CTR	Gq-CNO	1.147	SST
	RS	Gq-Sal	1.205	SST
	RS	Gq-CNO	0.145	SST
	Gq-Sal	Gq-CNO	1.153	SST
Figure 7G	CTR	RS	0.793	NSFT
	CTR	Gq-Sal	0.111	NSFT
	CTR	Gq-CNO	0.67	NSFT
	RS	Gq-Sal	0.93	NSFT
	RS	Gq-CNO	0.187	NSFT
	Gq-Sal	Gq-CNO	0.821	NSFT
Figure 7H	CTR	RS	1.197	TST
	CTR	Gq-Sal	0.307	TST
	CTR	Gq-CNO	1.105	TST
	RS	Gq-Sal	1.088	TST
	RS	Gq-CNO	0.239	TST
	Gq-Sal	Gq-CNO	0.989	TST
Figure 7I	CTR	RS	0.934	FST
	CTR	Gq-Sal	0.199	FST
	CTR	Gq-CNO	1.229	FST
	RS	Gq-Sal	0.727	FST
	RS	Gq-CNO	0.255	FST
	Gq-Sal	Gq-CNO	1.011	FST
Figure 7J	CTR	RS	0.189	OFT
	CTR	Gq-Sal	0.105	OFT
	CTR	Gq-CNO	0.155	OFT
	RS	Gq-Sal	0.318	OFT
	RS	Gq-CNO	0.025	OFT
	Gq-Sal	Gq-CNO	0.272	OFT
Figure 2—figure supplement 1D, Figure 7—figure supplement 1E	CTR	RS	1.242	TST
	CTR	Sal	0.282	TST
	CTR	CNO	0.32	TST
	CTR	RS-Sal	1.069	TST
	CTR	RS-CNO	1.069	TST
	RS	Sal	0.83	TST
	RS	CNO	1.058	TST
	RS	RS-Sal	0.104	TST
	RS	RS-CNO	0.083	TST
	Sal	CNO	0.007	TST
	Sal	RS-Sal	0.699	TST
	Sal	RS-CNO	0.704	TST
	CNO	RS-Sal	0.859	TST
	CNO	RS-CNO	0.86	TST
	RS-Sal	RS-CNO	0.016	TST
Figure 2—figure supplement 1E, Figure 7—figure supplement 1F	CTR	RS	1.073	FST
	CTR	Sal	0.266	FST
	CTR	CNO	0.314	FST
	CTR	RS-Sal	1.115	FST
	CTR	RS-CNO	1.15	FST
	RS	Sal	0.729	FST
	RS	CNO	0.835	FST
	RS	RS-Sal	0.034	FST
	RS	RS-CNO	0.092	FST
	Sal	CNO	0.005	FST
	Sal	RS-Sal	0.765	FST
	Sal	RS-CNO	0.739	FST
	CNO	RS-Sal	0.879	FST
	CNO	RS-CNO	0.889	FST
	RS-Sal	RS-CNO	0.132	FST
Figure 2—figure supplement 1F, Figure 7—figure supplement 1G	CTR	RS	0.198	OFT
	CTR	Sal	0.031	OFT
	CTR	CNO	0.116	OFT
	CTR	RS-Sal	0.216	OFT
	CTR	RS-CNO	0.132	OFT
	RS	Sal	0.161	OFT
	RS	CNO	0.047	OFT
	RS	RS-Sal	0.035	OFT
	RS	RS-CNO	0.033	OFT
	Sal	CNO	0.088	OFT
	Sal	RS-Sal	0.182	OFT
	Sal	RS-CNO	0.103	OFT
	CNO	RS-Sal	0.074	OFT
	CNO	RS-CNO	0.012	OFT
	RS-Sal	RS-CNO	0.061	OFT
Figure 7—figure supplement 1B	CTR	RS	0.674	TST
	CTR	Gq-Sal	0.558	TST
	CTR	Gq-CNO	0.556	TST
	RS	Gq-Sal	0.139	TST
	RS	Gq-CNO	0.09	TST
	Gq-Sal	Gq-CNO	0.037	TST
Figure 7—figure supplement 1C	CTR	RS	1.067	FST
	CTR	Gq-Sal	0.663	FST
	CTR	Gq-CNO	0.641	FST
	RS	Gq-Sal	0.286	FST
	RS	Gq-CNO	0.315	FST
	Gq-Sal	Gq-CNO	0.024	FST
Figure 7—figure supplement 1D	CTR	RS	0.535	OFT
	CTR	Gq-Sal	0.218	OFT
	CTR	Gq-CNO	0.282	OFT
	RS	Gq-Sal	0.209	OFT
	RS	Gq-CNO	0.217	OFT
	Gq-Sal	Gq-CNO	0.021	OFT
