# Supplementary material for: VTA-projecting cerebellar neurons mediate stress-dependent depression-like behaviors
Source: eLife. 2022 Feb 14;11:e72981. doi: 10.7554/eLife.72981 (PMC8843095; doi:10.7554/eLife.72981)
Supplement: Figure 7—source data 3. [file elife-72981-fig7-data3.xlsx]

## Sheet: Sheet1
Figure	Group	Male	Female	Total
Figure 7B-D	CTR	8	8	16
	RS	8	7	15
	Gq-Sal	10	9	19
	Gq-CNO	10	10	20
Figure 7F	CTR	13	14	27
	RS	14	13	27
	Gq-Sal	14	15	29
	Gq-CNO	15	15	30
Figure 7G	CTR	13	13	26
	RS	12	12	24
	Gq-Sal	13	14	27
	Gq-CNO	10	13	23
Figure 7H-J	CTR	10	11	21
	RS	11	10	21
	Gq-Sal	12	11	23
	Gq-CNO	12	12	24
Figure 7—figure supplement 1B-D	CTR	12	10	22
	RS	12	10	22
	Sal	10	12	22
	CNO	10	12	22
Figure 7—figure supplement 1E-G	CTR	16	15	31
	RS	12	13	25
	Gq-RS-Sal	8	7	15
	Gq-RS-CNO	8	8	16
Figure 7—figure supplement 1H	CTR	13	13	26
	RS	12	12	24
	Gq-Sal	13	14	27
	Gq-CNO	10	13	23
